# Supplementary material for: Formation of Natural Magnesium Silica Hydrate (M-S-H) and Magnesium Alumina Silica Hydrate (M-A-S-H) Cement
Source: MDPI journal article supplement (doi:10.3390/ma17050994), 2024-02-21
Supplement: s1 [file s1]

Table S1. Composition of brucite from Feragen.

| Sample                            | Fer1-12 | Fer1-12 | Fer7-12 |
|-----------------------------------|---------|---------|---------|
| SiO <sub>2</sub>                  | 2,81    | 0,83    | 0,16    |
| TiO <sub>2</sub>                  | 0,00    | 0,00    | 0,00    |
| Al <sub>2</sub> O <sub>3</sub>    | 0,01    | 0,00    | 0,01    |
| FeO                               | 15,00   | 6,28    | 9,75    |
| MnO                               | 0,62    | 0,29    | 0,30    |
| MgO                               | 55,19   | 61,98   | 60,10   |
| CaO                               | 0,00    | 0,07    | 0,07    |
| Na <sub>2</sub> O                 | 0,00    | 0,00    | 0,00    |
| K <sub>2</sub> O                  | 0,00    | 0,00    | 0,00    |
| Cr <sub>2</sub> O <sub>3</sub>    | 0,01    | 0,06    | 0,00    |
| NiO                               | 0,54    | 0,06    | 0,60    |
| Total                             | 74,16   | 69,56   | 70,95   |
| Structural formulae based on 2(O) |         |         |         |
| Si                                | 0,0554  | 0,0167  | 0,0033  |
| Ti                                | 0,0000  | 0,0001  | 0,0000  |
| Al                                | 0,0002  | 0,0000  | 0,0001  |
| Fe                                | 0,1236  | 0,0526  | 0,0824  |
| Mn                                | 0,0052  | 0,0025  | 0,0026  |
| Mg                                | 0,8112  | 0,9261  | 0,9060  |
| Ca                                | 0,0000  | 0,0008  | 0,0007  |
| Na                                | 0,0000  | 0,0000  | 0,0000  |
| K                                 | 0,0000  | 0,0000  | 0,0000  |
| Cr                                | 0,0001  | 0,0007  | 0,0000  |
| Ni                                | 0,0043  | 0,0005  | 0,0049  |
| Fe/Mg                             | 0,15    | 0,06    | 0,09    |

Table S2. Composition of cement in lithified till and moraine.

| Feragen |         |         |         |         |         |         |         |         |         | Leka    |         |         |         |         |         |          |          |          |          |          |
|---------|---------|---------|---------|---------|---------|---------|---------|---------|---------|---------|---------|---------|---------|---------|---------|----------|----------|----------|----------|----------|
| Sample  | Fer9-12 | Fer9-12 | Fer8-12 | Fer7-12 | Fer7-12 | Fer7-12 | LK14-G1a | LK14-G1a | LK14-G1a | LK14-G1a | LK14-G1b |
| SiO2    | 54,75   | 57,66   | 42,96   | 42,09   | 42,3    | 42,58   | 37,24   | 43,39   | 45,49   | 44,55   | 43,23   | 48,07   | 49,61   | 47,67   | 23,04   | 7,78     | 8,2      | 8,45     | 14,48    |          |
| TiO2    | 0,05    | 0,01    | 0       | 0       | 0,01    | 0,01    | 0       | 0,01    | 0       | 0       | 0       | 0       | 0       | 0,01    | 0       | 0        | 0,01     | 0        | 0,01     |          |
| Al2O3   | 3,16    | 0,75    | 0,18    | 0,15    | 0,77    | 0,36    | 0,03    | 1,27    | 0,01    | 0,13    | 0       | 0,39    | 1,55    | 0,06    | 12,89   | 18,47    | 18,68    | 18,42    | 16,42    |          |
| FeO     | 0,43    | 0,12    | 0,15    | 0,07    | 0,1     | 0,13    | 0,16    | 0,6     | 0,06    | 0,16    | 0,05    | 0,29    | 0,38    | 0,88    | 0,73    | 0,14     | 0,15     | 0,36     | 0,17     |          |
| MnO     | 0       | 0       | 0,05    | 0,01    | 0,02    | 0,02    | 0       | 0       | 0       | 0,01    | 0,03    | 0,09    | 0,09    | 0,07    | 0,05    | 0        | 0,04     | 0,02     | 0,06     |          |
| MgO     | 27,38   | 26,76   | 38,95   | 37,45   | 37,98   | 38,81   | 35,59   | 37,75   | 38,37   | 36,63   | 39,77   | 32,19   | 32,12   | 35,11   | 24,59   | 36,78    | 34,42    | 34,24    | 32,52    |          |
| CaO     | 0,28    | 0,06    | 0,07    | 0,07    | 0,02    | 0,01    | 0,05    | 0,06    | 0,1     | 0,06    | 0,05    | 0,23    | 0,11    | 0,41    | 0,73    | 0,1      | 0,11     | 0,04     | 0,14     |          |
| Na2O    | 0,2     | 0       | 0       | 0,01    | 0       | 0       | 0,02    | 0,06    | 0,02    | 0,07    | 0,01    | 0,01    | 0,06    | 0,08    | 0,14    | 0        | 0,03     | 0        | 0,03     |          |
| K2O     | 0,72    | 0,03    | 0,03    | 0,04    | 0,13    | 0,02    | 0,01    | 0,29    | 0,02    | 0,08    | 0,01    | 0,09    | 0,4     | 0,02    | 0,01    | 0        | 0        | 0,04     | 0,28     |          |
| Cr2O3   | 0       | 0       | 0       | 0       | 0       | 0,04    | 0       | 0,02    | 0       | 0       | 0       | 0,05    | 0,14    | 0,02    | 0,04    | 0,07     | 0        | 0        | 0        |          |
| NiO     | 0,01    | 0,01    | 0,07    | 0,05    | 0       | 0,06    | 0,02    | 0,03    | 0       | 0       | 0,03    | 0,08    | 0,01    | 0,05    | 0,22    | 0,15     | 0,18     | 0,42     | 0        |          |
| Total   | 86,97   | 85,36   | 82,41   | 79,89   | 81,31   | 82,03   | 73,03   | 83,47   | 84,05   | 81,63   | 83,17   | 81,48   | 84,25   | 84,37   | 62,44   | 63,46    | 61,78    | 61,88    | 64,12    |          |
| H2O     | 13,03   | 14,64   | 17,59   | 20,11   | 18,69   | 17,97   | 26,97   | 16,53   | 15,95   | 18,37   | 16,83   | 18,52   | 15,75   | 15,63   | 37,56   | 36,54    | 38,22    | 38,12    | 35,88    |          |

| Sample | LK14-G1b |
|--------|----------|----------|----------|----------|----------|----------|----------|----------|----------|----------|----------|----------|----------|----------|----------|----------|----------|----------|----------|
| SiO2   | 44,33    | 40,95    | 45,08    | 43,4     | 42,94    | 38,24    | 41,13    | 26,22    | 27,47    | 11,37    | 17,45    | 42,79    | 13,01    | 35,13    | 41,83    | 33,58    | 48,01    | 45,05    |          |
| TiO2   | 0,01     | 0        | 0        | 0        | 0,01     | 0        | 0        | 0,01     | 0,01     | 0,01     | 0,02     | 0        | 0        | 0        | 0,01     | 0        | 0,01     | 0,01     |          |
| Al2O3  | 0,02     | 0,03     | 0,01     | 0,03     | 0,04     | 0,31     | 0,02     | 14,75    | 20,04    | 12,59    | 12,23    | 0,75     | 14,04    | 3,61     | 1,7      | 8,34     | 0,1      | 0,31     |          |
| FeO    | 0,07     | 0,04     | 0,07     | 0,08     | 0,07     | 0,05     | 0,1      | 0,86     | 0,17     | 0,16     | 0,47     | 0,05     | 0,13     | 0,13     | 0,16     | 0,64     | 0,03     | 0,01     |          |
| MnO    | 0        | 0        | 0        | 0        | 0,01     | 0,09     | 0,16     | 0,05     | 0,01     | 0,04     | 0,05     | 0        | 0,04     | 0,01     | 0        | 0,11     | 0        | 0,01     |          |
| MgO    | 8,94     | 13,51    | 13,04    | 9,68     | 20,84    | 21,38    | 34,91    | 31,96    | 30,11    | 35,48    | 39,53    | 35,18    | 43,3     | 36,09    | 35,2     | 37,34    | 31,35    | 32,47    |          |
| CaO    | 0,13     | 0,14     | 0,06     | 0,11     | 0,17     | 0,11     | 0,15     | 1,37     | 2,82     | 0        | 0,04     | 0,06     | 0,23     | 0,07     | 0,15     | 0,08     | 0,45     | 0,39     |          |
| Na2O   | 0,04     | 0,02     | 0,01     | 0        | 0,01     | 0,01     | 0        | 0,75     | 1,96     | 0,05     | 0        | 0        | 0,35     | 0        | 0,03     | 0,01     | 0        | 0        |          |
| K2O    | 0,05     | 0,01     | 0,06     | 0,04     | 0,02     | 0,05     | 0,02     | 0,13     | 0,02     | 0,09     | 0,02     | 0        | 0,02     | 0,03     | 0,44     | 0,02     | 0,02     | 0        |          |
| Cr2O3  | 0,01     | 0,01     | 0        | 0        | 0        | 0        | 0,01     | 0        | 0,02     | 0        | 0,06     | 0        | 0,01     | 0        | 0,03     | 0,05     | 0        | 0,02     |          |
| NiO    | 0,01     | 0,01     | 0        | 0,02     | 0        | 0,02     | 0,01     | 0,03     | 0,03     | 0,08     | 0,09     | 0,01     | 0,17     | 0,09     | 0        | 0,03     | 0,01     | 0        |          |
| Total  | 53,63    | 54,67    | 58,32    | 53,31    | 64,09    | 60,19    | 76,67    | 76,1     | 82,65    | 59,85    | 69,95    | 78,75    | 71,31    | 75,03    | 79,58    | 80,2     | 79,97    | 78,25    |          |
| H2O    | 46,37    | 45,33    | 41,68    | 46,69    | 35,91    | 39,81    | 23,33    | 23,9     | 17,35    | 40,15    | 30,05    | 21,25    | 28,69    | 24,97    | 20,42    | 19,8     | 20,03    | 21,75    |          |

Table S3. Whole rock composition of the blue(inner) and yellow(outer) weathering rinds and pristine peridotite(dark) and two samples of gravel.

| Sample                               | F09.11 |        |        | F12.11 |        |        | R17.11 |        |        |
|--------------------------------------|--------|--------|--------|--------|--------|--------|--------|--------|--------|
|                                      | Dark   | Blue   | Yellow | Dark   | Blue   | Yellow | Dark   | Blue   | Yellow |
| SiO <sub>2</sub>                     | 36.31  | 39.62  | 38.86  | 35.33  | 37.82  | 39.54  | 34.86  | 37.29  | 38.5   |
| Al <sub>2</sub> O <sub>3</sub>       | 0.14   | 0.19   | 0.22   | 0.06   | 0.11   | 0.14   | 0.48   | 0.32   | 0.47   |
| Fe <sub>2</sub> O <sub>3</sub>       |        |        |        |        |        |        | 2.46   | 4.08   | 5.21   |
| FeO                                  |        |        |        |        |        |        | 4.5    | 3.3    | 2.9    |
| Fe <sub>2</sub> O <sub>3</sub> (T)   | 7.88   | 8.4    | 8.66   | 6.00   | 8.12   | 8.25   | 7.46   | 7.74   | 8.43   |
| MnO                                  | 0.11   | 0.12   | 0.12   | 0.09   | 0.09   | 0.05   | 0.11   | 0.11   | 0.11   |
| MgO                                  | 44.19  | 40.92  | 41.83  | 43.16  | 38.28  | 36.43  | 42.85  | 40.21  | 38.92  |
| CaO                                  | 0.05   | 0.21   | 0.06   | 0.05   | 0.05   | 0.04   | 0.12   | 0.09   | 0.08   |
| Na <sub>2</sub> O                    | 0.04   | 0.06   | 0.07   | 0.01   | 0.03   | 0.04   | < 0.01 | 0.01   | 0.01   |
| K <sub>2</sub> O                     | 0.02   | 0.02   | 0.04   | < 0.01 | < 0.01 | 0.02   | < 0.01 | < 0.01 | < 0.01 |
| TiO <sub>2</sub>                     | 0.001  | 0.002  | 0.002  | 0.001  | 0.001  | 0.002  | 0.004  | 0.002  | 0.003  |
| P <sub>2</sub> O <sub>5</sub>        | < 0.01 | 0.04   | 0.07   | < 0.01 | < 0.01 | 0.07   | < 0.01 | < 0.01 | 0.01   |
| LOI                                  | 10.28  | 10.03  | 10.1   | 15.35  | 14.77  | 14.36  | 12.29  | 12.42  | 11.49  |
| Total                                | 99     | 99.61  | 100    | 100.1  | 99.3   | 98.94  | 99.2   | 98.59  | 98.37  |
| CO <sub>2</sub>                      |        |        |        |        |        |        | 1.09   | 0.47   | 0.46   |
| MgO/SiO <sub>2</sub>                 | 1.22   | 1.03   | 1.08   | 1.22   | 1.01   | 0.92   | 1.23   | 1.08   | 1.01   |
| MgO/Fe <sub>2</sub> O <sub>3</sub> T | 5.61   | 4.87   | 4.83   | 7.19   | 4.71   | 4.42   | 6.38   | 5.76   | 5.13   |
| MgO/NiO                              | 153    | 113    | 131    | 114    | 90     | 72     | 167    | 145    | 141    |
| Fe <sub>2</sub> O <sub>3</sub> /FeO  |        |        |        |        |        |        | 0.5    | 1.2    | 1.8    |
| Sc                                   | 3      | 3      | 3      | 2      | 2      | 3      | 4      | 4      | 4      |
| Be                                   | < 1    | < 1    | < 1    | < 1    | < 1    | < 1    | < 1    | < 1    | < 1    |
| V                                    | 7      | 12     | < 5    | 7      | 6      | 11     | 24     | 15     | 21     |
| Cr                                   | 2090   | 2370   | 1930   | 520    | 700    | 480    | 7420   | 4840   | 6460   |
| Co                                   | 114    | 121    | 123    | 103    | 109    | 93     | 100    | 106    | 103    |
| Ni                                   | 2190   | 2760   | 2430   | 2870   | 3240   | 3840   | 1950   | 2100   | 2090   |
| Cu                                   | < 10   | < 10   | < 10   | < 10   | < 10   | 10     | < 10   | < 10   | < 10   |
| Zn                                   | 40     | 50     | 70     | 40     | 40     | 80     | 50     | 40     | 60     |
| Ga                                   | < 1    | < 1    | < 1    | < 1    | < 1    | < 1    | < 1    | < 1    | < 1    |
| Ge                                   | 0.9    | 1      | 0.9    | 1      | 1.1    | 1.1    | 0.7    | 0.7    | 0.8    |
| As                                   | < 5    | < 5    | < 5    | < 5    | < 5    | < 5    | < 5    | < 5    | < 5    |
| Rb                                   | < 1    | 1      | < 1    | 1      | 1      | 2      | < 1    | < 1    | < 1    |
| Sr                                   | < 2    | 3      | 2      | < 2    | < 2    | < 2    | < 2    | < 2    | < 2    |
| Y                                    | < 0.5  | < 0.5  | < 0.5  | < 0.5  | 1.1    | 0.6    | < 0.5  | < 0.5  | < 0.5  |
| Zr                                   | 2      | 2      | < 1    | 3      | 3      | 3      | < 1    | < 1    | < 1    |
| Nb                                   | < 0.2  | < 0.2  | 0.3    | < 0.2  | < 0.2  | < 0.2  | < 0.2  | < 0.2  | < 0.2  |
| Mo                                   | < 2    | < 2    | < 2    | < 2    | < 2    | < 2    | < 2    | < 2    | < 2    |
| Ag                                   | < 0.5  | < 0.5  | < 0.5  | < 0.5  | < 0.5  | < 0.5  | < 0.5  | < 0.5  | < 0.5  |
| In                                   | < 0.1  | < 0.1  | < 0.1  | < 0.1  | < 0.1  | < 0.1  | < 0.1  | < 0.1  | < 0.1  |
| Sn                                   | < 1    | < 1    | < 1    | < 1    | < 1    | < 1    | < 1    | < 1    | < 1    |
| Sb                                   | 0.9    | 1.2    | 1.1    | 0.9    | 1      | 0.8    | < 0.2  | < 0.2  | < 0.2  |
| Cs                                   | < 0.1  | < 0.1  | < 0.1  | < 0.1  | 0.1    | 0.1    | < 0.1  | < 0.1  | < 0.1  |
| Ba                                   | 2      | 7      | 13     | 4      | 4      | 10     | 11     | < 3    | < 3    |
| La                                   | 0.05   | 0.22   | 0.17   | 0.11   | 0.24   | 1.19   | 1.26   | 0.3    | 0.07   |
| Ce                                   | 0.07   | 0.21   | 0.29   | 0.08   | 0.16   | 0.87   | 2.46   | 0.44   | 0.16   |
| Pr                                   | < 0.01 | 0.04   | 0.04   | 0.01   | 0.05   | 0.14   | 0.27   | 0.05   | 0.02   |
| Nd                                   | < 0.05 | 0.12   | 0.15   | < 0.05 | 0.19   | 0.55   | 0.92   | 0.13   | 0.06   |
| Sm                                   | < 0.01 | 0.05   | 0.02   | 0.05   | 0.11   | 0.12   | 0.1    | 0.03   | 0.02   |
| Eu                                   | 0.011  | 0.013  | 0.011  | 0.005  | 0.005  | 0.015  | 0.023  | 0.005  | 0.005  |
| Gd                                   | < 0.01 | 0.02   | 0.04   | < 0.01 | 0.18   | 0.04   | 0.04   | 0.01   | < 0.01 |
| Tb                                   | < 0.01 | < 0.01 | < 0.01 | < 0.01 | 0.03   | 0.01   | < 0.01 | < 0.01 | < 0.01 |
| Dy                                   | < 0.01 | 0.03   | 0.02   | < 0.01 | 0.22   | 0.1    | 0.02   | < 0.01 | < 0.01 |
| Ho                                   | < 0.01 | < 0.01 | < 0.01 | < 0.01 | 0.04   | 0.02   | < 0.01 | < 0.01 | < 0.01 |

|    |        |        |        |        |        |        |        |        |        |
|----|--------|--------|--------|--------|--------|--------|--------|--------|--------|
| Er | < 0.01 | 0.01   | 0.01   | < 0.01 | 0.12   | 0.05   | < 0.01 | < 0.01 | < 0.01 |
| Tm | 0.005  | 0.005  | 0.005  | 0.005  | 0.016  | 0.011  | 0.005  | 0.005  | 0.005  |
| Yb | < 0.01 | 0.04   | 0.02   | < 0.01 | 0.08   | 0.07   | < 0.01 | < 0.01 | 0.01   |
| Lu | 0.002  | 0.006  | 0.003  | 0.004  | 0.011  | 0.007  | 0.002  | 0.002  | 0.002  |
| Hf | < 0.1  | < 0.1  | < 0.1  | < 0.1  | < 0.1  | < 0.1  | < 0.1  | < 0.1  | < 0.1  |
| Ta | 0.24   | 0.32   | 0.29   | 0.31   | 0.3    | 0.38   | < 0.01 | < 0.01 | 0.01   |
| W  | 1.6    | 2.6    | 1.6    | 3.9    | 23.8   | 2.8    | < 0.5  | < 0.5  | < 0.5  |
| Tl | < 0.05 | < 0.05 | < 0.05 | < 0.05 | < 0.05 | < 0.05 | < 0.05 | < 0.05 | < 0.05 |
| Pb | < 5    | < 5    | 6      | < 5    | < 5    | 7      | < 5    | < 5    | < 5    |
| Bi | < 0.1  | < 0.1  | < 0.1  | < 0.1  | < 0.1  | < 0.1  | < 0.1  | < 0.1  | < 0.1  |
| Th | < 0.05 | < 0.05 | < 0.05 | < 0.05 | < 0.05 | 0.11   | 0.17   | < 0.05 | < 0.05 |
| U  | < 0.01 | 0.02   | 0.02   | 0.02   | 0.03   | 0.07   | < 0.01 | < 0.01 | < 0.01 |

Table S3. Continued

[illegible]

|    |        |        |        |        |        |        |        |        |        |        |
|----|--------|--------|--------|--------|--------|--------|--------|--------|--------|--------|
| In | < 0.1  | < 0.1  | < 0.1  | < 0.1  | < 0.1  | < 0.1  | < 0.1  | < 0.1  | < 0.1  | < 0.1  |
| Sn | < 1    | < 1    | < 1    | < 1    | < 1    | < 1    | < 1    | < 1    | < 1    | < 1    |
| Sb | < 0.2  | < 0.2  | < 0.2  | < 0.2  | < 0.2  | < 0.2  | < 0.2  | < 0.2  | < 0.2  | 0.2    |
| Cs | < 0.1  | < 0.1  | < 0.1  | < 0.1  | < 0.1  | < 0.1  | < 0.1  | < 0.1  | < 0.1  | 0.1    |
| Ba | 4      | < 3    | < 3    | 4      | 4      | 3      | 3      | 4      | 3      | 27     |
| La | 0.62   | 0.18   | 0.15   | < 0.05 | 0.06   | < 0.05 | 0.42   | 0.1    | 0.23   | 0.49   |
| Ce | 1.13   | 0.32   | 0.11   | < 0.05 | 0.09   | 0.07   | 0.59   | 0.2    | 0.36   | 1.07   |
| Pr | 0.12   | 0.04   | 0.01   | < 0.01 | 0.01   | < 0.01 | 0.03   | 0.02   | 0.03   | 0.12   |
| Nd | 0.38   | 0.16   | 0.05   | < 0.05 | 0.07   | 0.07   | 0.2    | 0.08   | 0.11   | 0.46   |
| Sm | 0.05   | 0.02   | < 0.01 | < 0.01 | < 0.01 | < 0.01 | 0.02   | 0.01   | 0.02   | 0.08   |
| Eu | 0.014  | <0.005 | 0.005  | 0.005  | 0.005  | 0.005  | 0.005  | 0.005  | 0.005  | 0.019  |
| Gd | 0.04   | 0.01   | < 0.01 | < 0.01 | < 0.01 | < 0.01 | 0.03   | < 0.01 | 0.01   | 0.08   |
| Tb | < 0.01 | < 0.01 | < 0.01 | < 0.01 | < 0.01 | < 0.01 | < 0.01 | < 0.01 | < 0.01 | 0.01   |
| Dy | 0.02   | 0.01   | 0.01   | < 0.01 | 0.02   | 0.02   | 0.02   | 0.02   | < 0.01 | 0.09   |
| Ho | < 0.01 | < 0.01 | < 0.01 | < 0.01 | < 0.01 | < 0.01 | < 0.01 | < 0.01 | < 0.01 | 0.02   |
| Er | 0.01   | < 0.01 | < 0.01 | < 0.01 | < 0.01 | < 0.01 | < 0.01 | 0.01   | < 0.01 | 0.05   |
| Tm | 0.005  | 0.005  | 0.005  | 0.005  | 0.005  | 0.005  | 0.005  | 0.005  | 0.005  | 0.008  |
| Yb | 0.02   | < 0.01 | 0.01   | 0.03   | 0.01   | 0.02   | 0.03   | 0.03   | 0.01   | 0.05   |
| Lu | 0.004  | 0.002  | 0.003  | 0.002  | 0.006  | 0.002  | 0.004  | 0.002  | 0.003  | 0.01   |
| Hf | < 0.1  | < 0.1  | < 0.1  | < 0.1  | < 0.1  | < 0.1  | < 0.1  | < 0.1  | < 0.1  | 0.2    |
| Ta | 0.01   | < 0.01 | < 0.01 | < 0.01 | < 0.01 | < 0.01 | < 0.01 | < 0.01 | < 0.01 | 0.02   |
| W  | < 0.5  | < 0.5  | < 0.5  | 0.5    | < 0.5  | < 0.5  | < 0.5  | < 0.5  | < 0.5  | < 0.5  |
| Tl | < 0.05 | < 0.05 | < 0.05 | < 0.05 | < 0.05 | < 0.05 | < 0.05 | < 0.05 | < 0.05 | < 0.05 |
| Pb | < 5    | < 5    | < 5    | < 5    | < 5    | < 5    | < 5    | < 5    | < 5    | < 5    |
| Bi | < 0.1  | < 0.1  | < 0.1  | < 0.1  | < 0.1  | < 0.1  | < 0.1  | < 0.1  | < 0.1  | < 0.1  |
| Th | 0.08   | 0.05   | 0.05   | < 0.05 | < 0.05 | < 0.05 | < 0.05 | < 0.05 | < 0.05 | 0.15   |
| U  | 0.01   | 0.04   | 0.02   | < 0.01 | < 0.01 | < 0.01 | < 0.01 | 0.01   | < 0.01 | 0.04   |

Table S4. Composition of till from trench through mudboil(FER18/15 and 19/15) and nearby tillite (FER21/15).

|          | FER18/15<br>Trench | FER19/15<br>Trench | FER21/15<br>Tillite |
|----------|--------------------|--------------------|---------------------|
| SiO2     | 87,72              | 89,58              | 72,81               |
| Al2O3    | 4,48               | 4,23               | 4,25                |
| Fe2O3(T) | 1,54               | 1,42               | 1,01                |
| MnO      | 0,02               | 0,02               | 0,01                |
| MgO      | 0,79               | 0,63               | 9,98                |
| CaO      | 0,26               | 0,3                | 0,24                |
| Na2O     | 0,69               | 0,7                | 0,56                |
| K2O      | 2,11               | 1,99               | 1,9                 |
| TiO2     | 0,2                | 0,21               | 0,16                |
| P2O5     | 0,04               | 0,03               | 0,03                |
| LOI      | 0,7                | 0,52               | 9,4                 |
| Total    | 98,55              | 99,61              | 100,4               |
|          |                    |                    |                     |
| Be       | < 1                | < 1                | < 1                 |
| V        | 15                 | 13                 | 12                  |
| Cr       | 110                | 230                | 30                  |
| Co       | 4                  | 4                  | 3                   |
| Ni       | 40                 | 40                 | 60                  |
| Cu       | < 10               | < 10               | < 10                |
| Zn       | < 30               | < 30               | < 30                |
| Ga       | 5                  | 4                  | 4                   |

|    |       |       |       |
|----|-------|-------|-------|
| Ge | 1     | 0,8   | 1,1   |
| As | < 5   | < 5   | < 5   |
| Rb | 53    | 49    | 51    |
| Sr | 39    | 45    | 36    |
| Y  | 8,7   | 9,1   | 9,5   |
| Zr | 164   | 188   | 136   |
| Nb | 4     | 3,8   | 4,1   |
| Mo | < 2   | 4     | < 2   |
| Ag | 0,7   | 0,8   | 0,5   |
| In | < 0.1 | < 0.1 | < 0.1 |
| Sn | < 1   | < 1   | < 1   |
| Sb | 0,4   | 0,4   | 0,5   |
| Cs | 0,8   | 0,7   | 0,8   |
| Ba | 387   | 376   | 344   |
| La | 11,3  | 10,1  | 9,88  |
| Ce | 22,6  | 20,5  | 19,1  |
| Pr | 2,58  | 2,41  | 2,3   |
| Nd | 9,78  | 9,01  | 8,97  |
| Sm | 1,98  | 1,85  | 1,64  |
| Eu | 0,421 | 0,439 | 0,432 |
| Gd | 1,64  | 1,56  | 1,51  |
| Tb | 0,27  | 0,27  | 0,26  |
| Dy | 1,66  | 1,62  | 1,54  |
| Ho | 0,32  | 0,33  | 0,33  |
| Er | 0,95  | 0,97  | 0,93  |
| Tm | 0,147 | 0,151 | 0,147 |
| Yb | 0,97  | 1,02  | 1,02  |
| Lu | 0,151 | 0,159 | 0,156 |
| Hf | 3,5   | 4,1   | 3,2   |
| Ta | 0,55  | 0,52  | 0,53  |
| W  | 1,5   | 1,4   | 1,1   |
| Tl | 0,23  | 0,23  | 0,22  |
| Pb | 7     | 7     | 7     |
| Bi | < 0.1 | < 0.1 | < 0.1 |
| Th | 2,66  | 2,23  | 1,99  |
| U  | 0,83  | 0,85  | 0,73  |
